# Supplementary material for: Fabrication of an Fe-Doped ZIF-67 Derived Magnetic Fe/Co/C Composite for Effective Removal of Congo Red
Source: MDPI journal article supplement (doi:10.3390/molecules29092078), 2024-04-30
Supplement: s1 [file s1]

# Electronic Supplementary information

## **Fabrication of a Fe-Doped ZIF-67 Derived Magnetic Fe/Co/C Composite for Effective Removal of Congo Red**

Yu Cao <sup>1,\*</sup>, Zeming Dai <sup>1</sup>, Xuan Zhou <sup>1</sup>, Yuting Lin <sup>1</sup> and Jianhua Hou <sup>1,2,\*</sup>

<sup>1</sup> College of Environmental Science and Engineering, Yangzhou University, Yangzhou 225000, China; dzmzeming@163.com (Z.D.); yzdxzx@yeah.net (X.Z.); Linyut@yeah.net (Y.L.)

<sup>2</sup> Jiangsu Collaborative Innovation Center for Solid Organic Waste Resource Utilization, Nanjing 210095, China

\* Correspondence: yuca@yzu.edu.cn (Y.C.); jhh@yzu.edu.cn (J.H.); Tel.: +86-514-8797868608 (Y.C.)

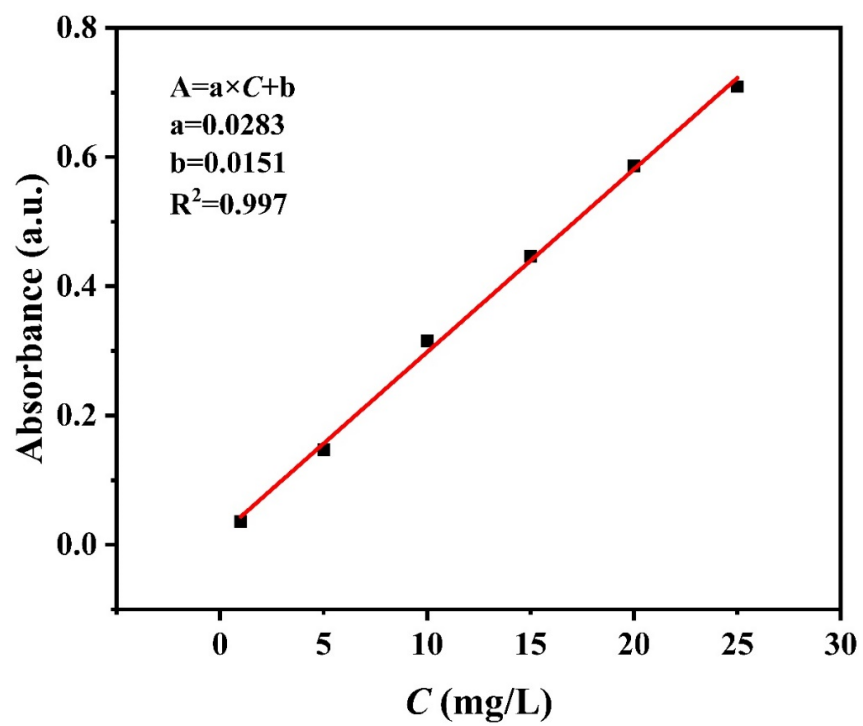

**Figure S1.** Standard curve of CR.

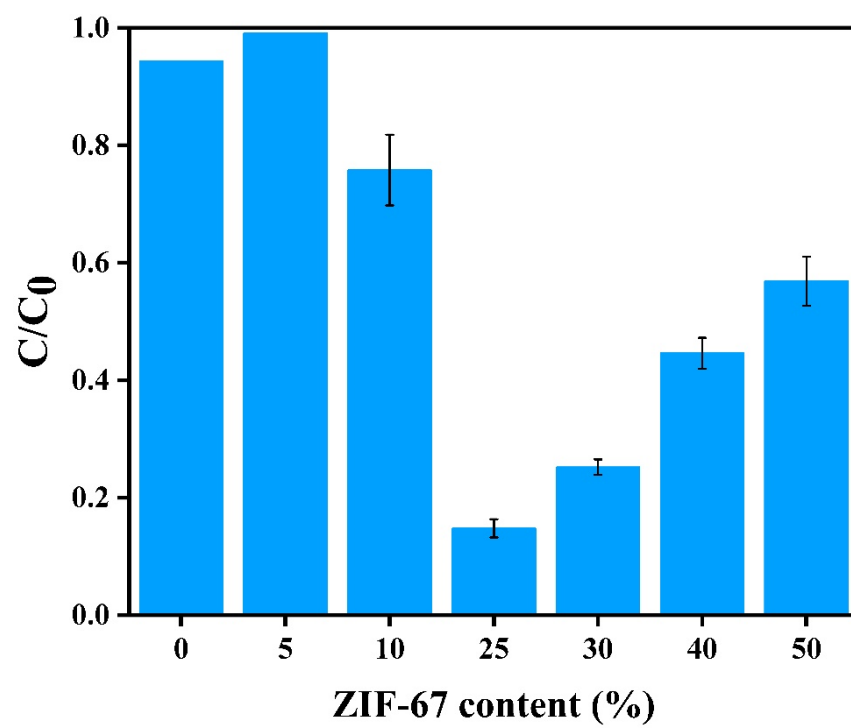

**Figure S2.** Effects of different ZIF-67 content on CR treatment.

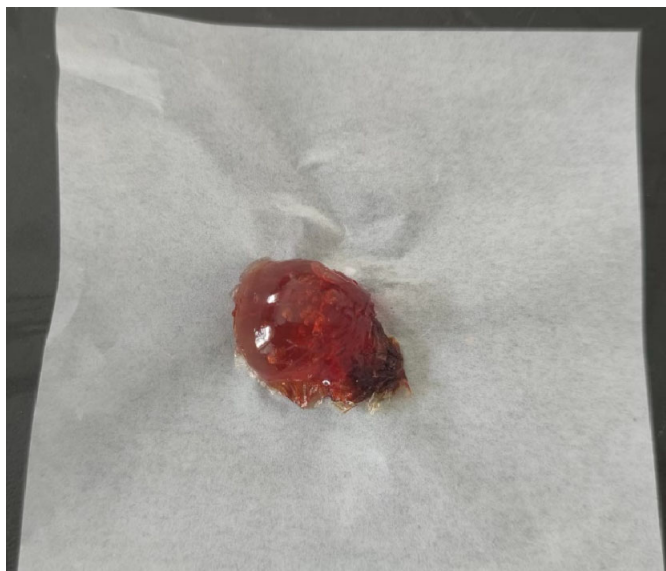

**Figure S3.** Image of material after solution evaporation.

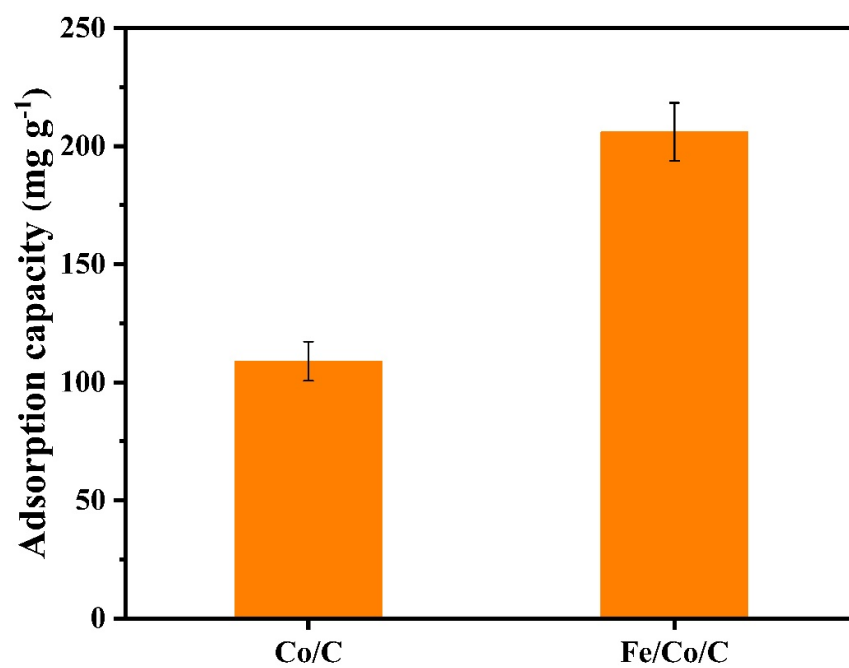

**Figure S4.** Comparison of the adsorption capacity of Co/C and Fe/Co/C.

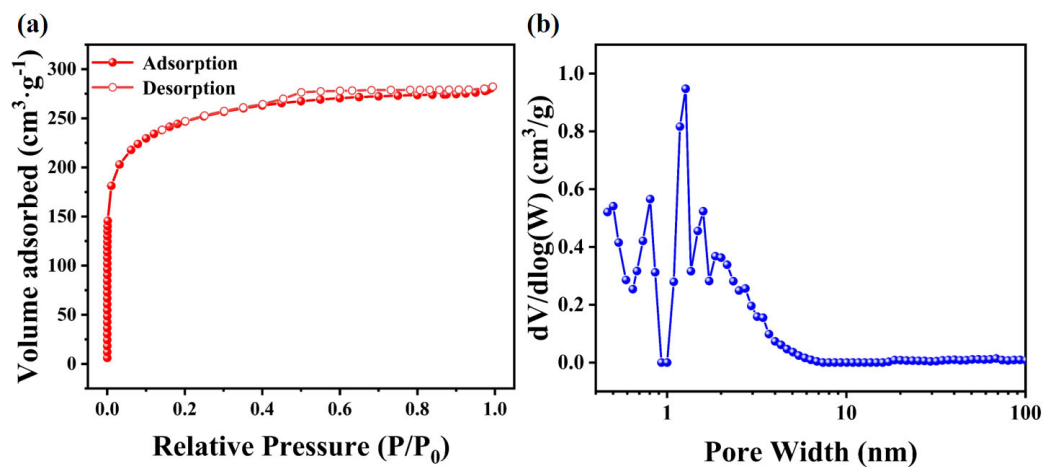

**Figure S5.** (a) Adsorption/desorption curves of Fe/Co/C material and (b) Pore size distribution of Fe/Co/C material.

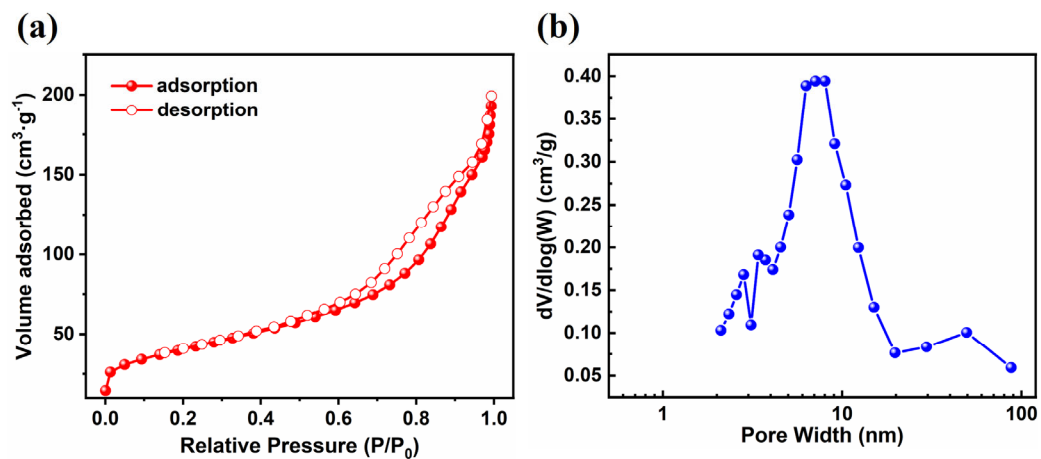

**Figure S6.** (a) Adsorption/desorption curves of Co/C material and (b) Pore size distribution of Co/C material.

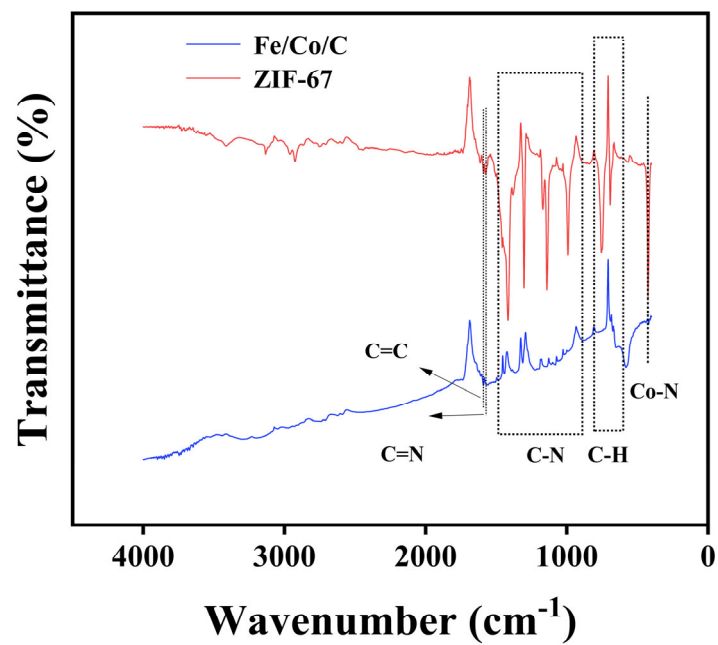

**Figure S7.** FTIR patterns of ZIF-67 and Fe/Co/C.



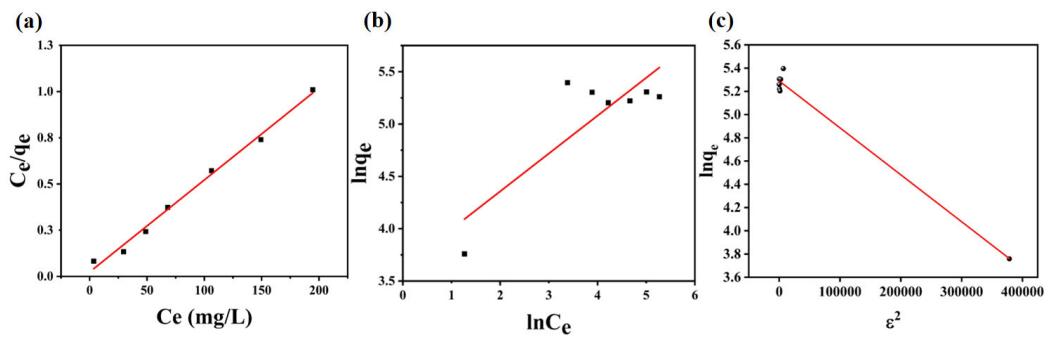

**Figure S8.** (a) Fitting of adsorption isotherms for linear Fe/Co/C Langmuir model. (b) Fitting of adsorption isotherms for linear Fe/Co/C Freundlich model. (c) Fitting of adsorption isotherms for linear Fe/Co/C Dubinin-Radushkevich model.

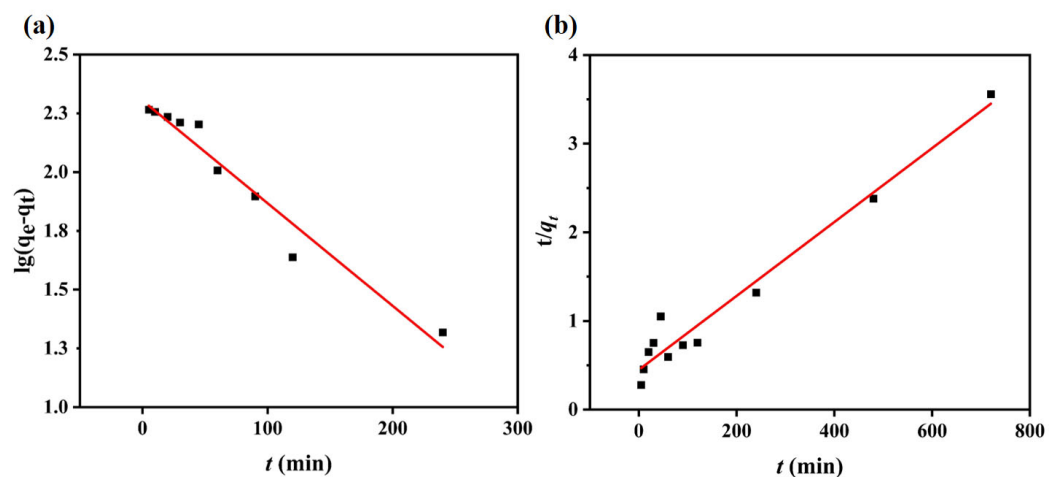

**Figure S9.** (a) Pseudo-first-order kinetic fitting. (b) Pseudo-second-order kinetic fitting.

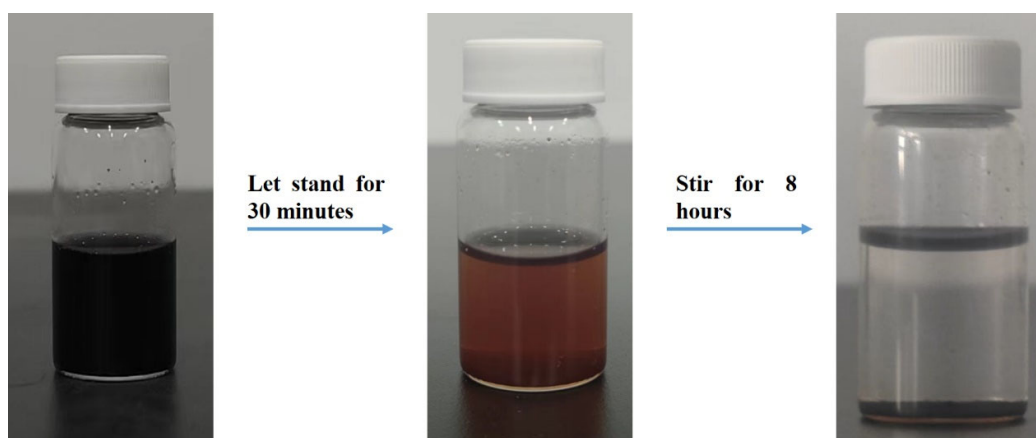

**Figure S10.** Removal process changes image.

**Table S1.** Comparison of other materials.

| Name                                                     | Material classification                     | Saturation magnetization | Target pollution | $q_m$ (mg·L <sup>-1</sup> ) | Ref              |
|----------------------------------------------------------|---------------------------------------------|--------------------------|------------------|-----------------------------|------------------|
| Fe/Co/C                                                  | MOF-derived materials                       | 84. emu g <sup>-1</sup>  | Congo red        | 200.8                       | <b>This work</b> |
| m-CS-c-PAM                                               | composite material                          | 5.74 emu g <sup>-1</sup> | Sunset Yellow    | 359.71                      | 48               |
| MSPA                                                     | activated carbon                            | 4.58 emu g <sup>-1</sup> | Rhodamine B      | 475.49                      | 49               |
| nZVI/BC                                                  | composite material                          | 38.7 emu g <sup>-1</sup> | Malachite green  | 515.77                      | 50               |
| Gel-CNT-MNPs                                             | composite material                          | 31 emu g <sup>-1</sup>   | methylene blue   | 465.5                       | 51               |
| chitosan@Fe <sub>3</sub> O <sub>4</sub>                  | composite material                          | 4.85 emu g <sup>-1</sup> | Congo red        | 727.8                       | 52               |
| A. sphaerica-Fe <sub>3</sub> O <sub>4</sub> (algalbased) | surface-modified Anabaena sphaerica biomass | 2.76 emu g <sup>-1</sup> | Remazol Red F3B  | 63.9                        | 53               |

## References (the serial number of the references corresponds to the order in the main article)

48. Jiang, R.; Shen, T.; Zhu, H.; Fu, Y.; Jiang, S.; Li, J.; Wang, J. Magnetic Fe<sub>3</sub>O<sub>4</sub> embedded chitosan–crosslinked-polyacrylamide composites with enhanced removal of food dye: Characterization, adsorption and mechanism. *Int. J. Biol. Macromol.* **2023**, 227, 1234–1244.
49. Cheng, S.; Zhao, S.; Xing, B.; Shi, C.; Meng, W.; Zhang, C.; Bo, Z. Facile one-pot green synthesis of magnetic separation photocatalyst-adsorbent and its application. *J. Water Process Eng.* **2022**, 47, 102802.
50. Eltaweil, A.S.; Ali Mohamed, H.; Abd El-Monaem, E.M.; El-Subruiti, G.M. Mesoporous magnetic biochar composite for enhanced adsorption of malachite green dye: Characterization, adsorption kinetics, thermodynamics and isotherms. *Adv. Powder Technol.* **2020**, 31, 1253–1263.
51. Saber-Samandari, S.; Saber-Samandari, S.; Joneidi-Yekta, H.; Mohseni, M. Adsorption of anionic and cationic dyes from aqueous solution using gelatin-based magnetic nanocomposite beads comprising carboxylic acid functionalized carbon nanotube. *Chem. Eng. J.* **2017**, 308, 1133–1144.
52. Wang, H.; Luo, W.; Guo, R.; Li, D.; Xue, B. Effective adsorption of Congo red dye by magnetic chitosan prepared by solvent-free ball milling. *Mater. Chem. and Phys.* **2022**, 292, 126857.
53. Abdel-Wahed, M.S.; El-Kalliny, A.S.; Shehata, F.A.; El-Aty, A.M.A.; Gad-Allah, T. A one-pot green synthesis of magnetic adsorbent via anabaena sphaerica and its performance towards remazol red dye removal from aqueous media. *Chem. Eng. Sci.* **2023**, 279, 118939.
